# Supplementary material for: Lower body kinematic changes induced by anterior cruciate ligament transection: an in vivo three-dimensional analysis in rats
Source: PeerJ journal article supplement (doi:10.7717/peerj.21016), 2026-03-23

a

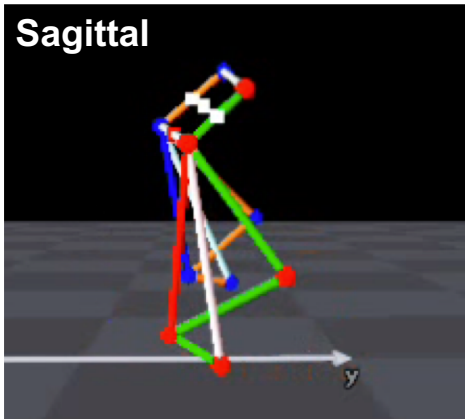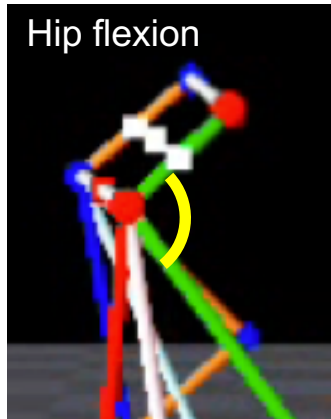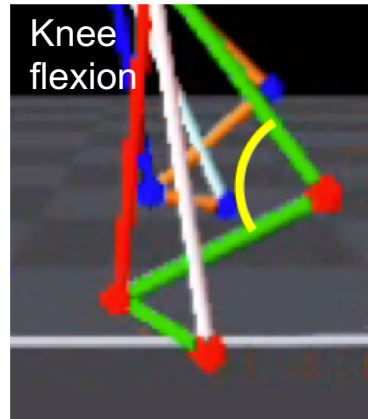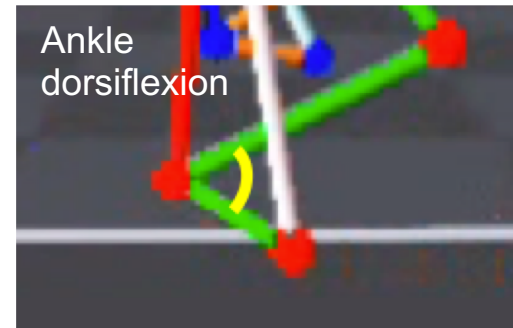

b

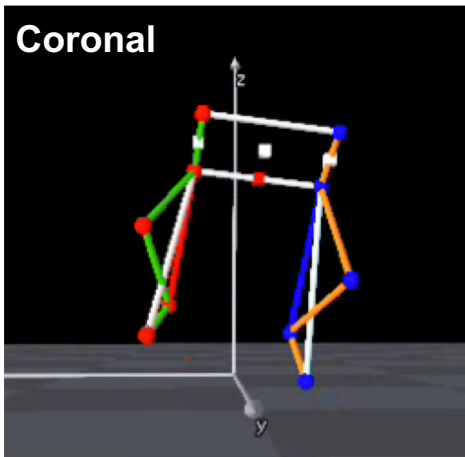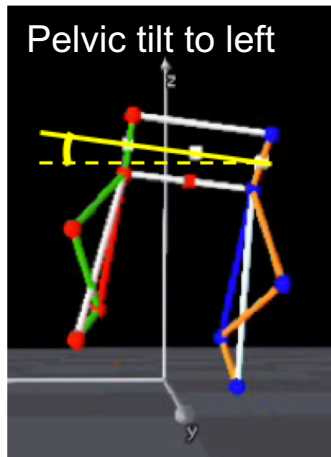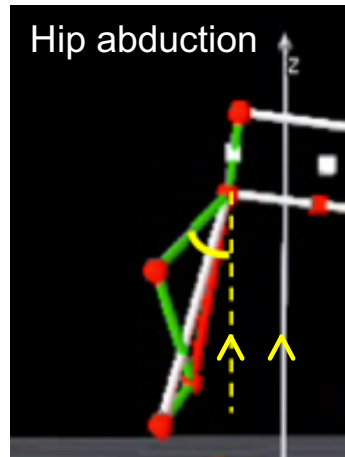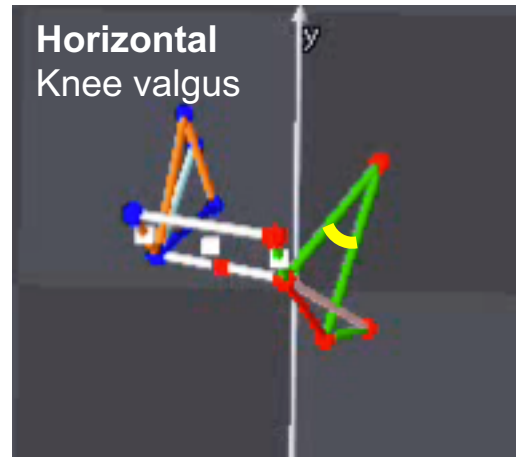

Supplement: Suppl_Fig1.pdf [file Suppl_Fig1.pdf]
